# Supplementary material for: Apolipoprotein A-I Supports MSCs Survival under Stress Conditions
Source: PubMed Central journal article supplement (PMC7312015; doi:10.3390/ijms21114062), 2020-06-05
Supplement: ijms-21-04062-s001.pdf [file ijms-21-04062-s001.pdf]

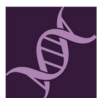

## Supplementary Materials

# ApolipoproteinA-1 Supports MSCs Survival under Stress Condition

Svetlana Miroshnichenko <sup>1,2\*</sup>, Ivan Usynin <sup>1</sup>, Alexey Dudarev <sup>1</sup>, Vadim Nimaev <sup>2</sup> and Anastasiya Solovieva <sup>2\*</sup>

<sup>1</sup> Institute of Biochemistry, FRC FTM, 2 Timakova str., 630117 Novosibirsk, Russian Federation, svmiro@yandex.ru (S.M.),

<sup>2</sup> Research Institute of Clinical and Experimental Lymphology– Branch of the ICG SB RAS, 2 Timakova str., 630060 Novosibirsk, Russian Federation, svmiro@yandex.ru (S.M.), solovevaao@gmail.com (A.S.), nimaev@gmail.com (V.N.)

\* Correspondence: svmiro@yandex.ru, solovevaao@gmail.com

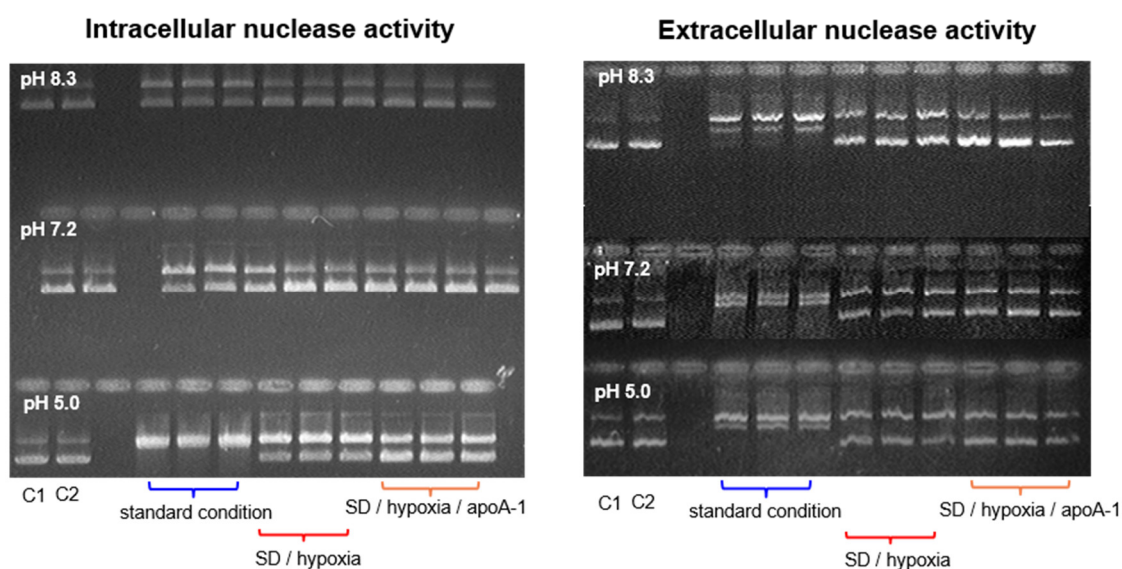

**Figure S1.** Full 0.8% agarose gels electrophoregram illustrating the intracellular and secreted nuclease activity. C1—control 1-hole pDNA, C2—control 2-pDNA/cells (for intracellular) or media (for secreted)/EDTA.

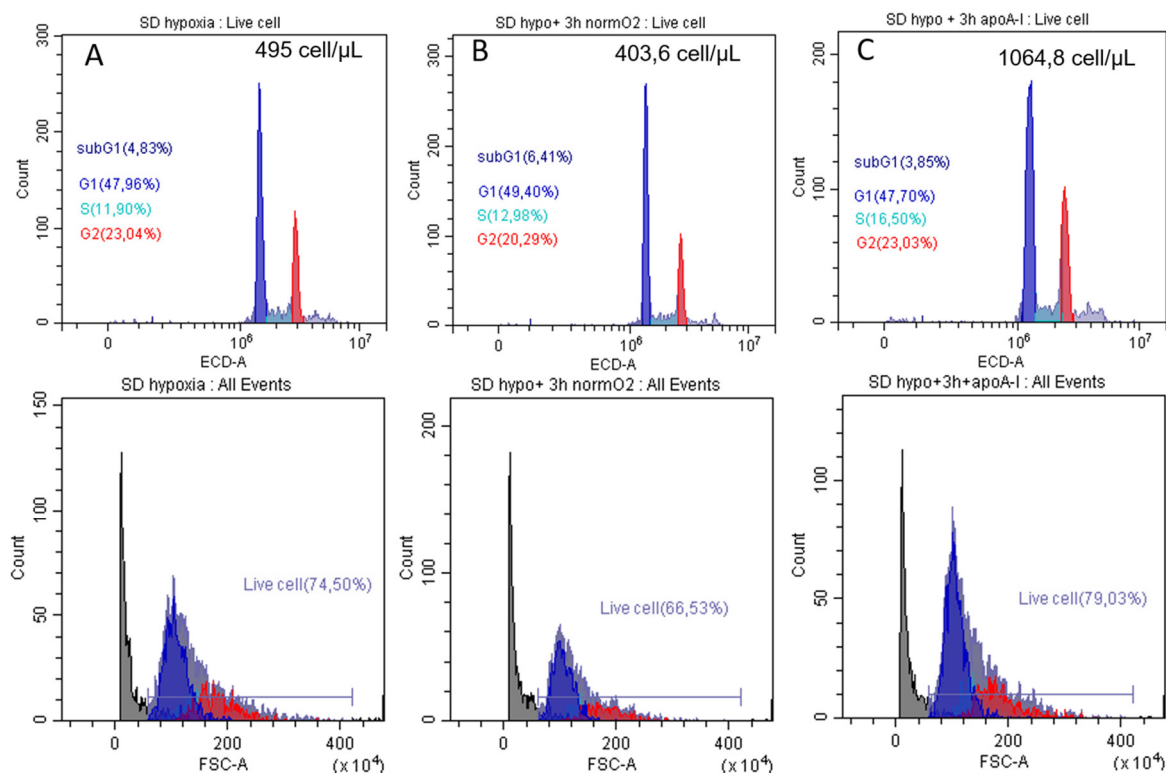

**Figure S2.** Cell cycle of MSCs cultivated under SD and hypoxia conditions for 24 hours (precondition) (A) followed by 3 hours under normoxic condition (B) and 3 hours normoxic condition with apoA-I (C).

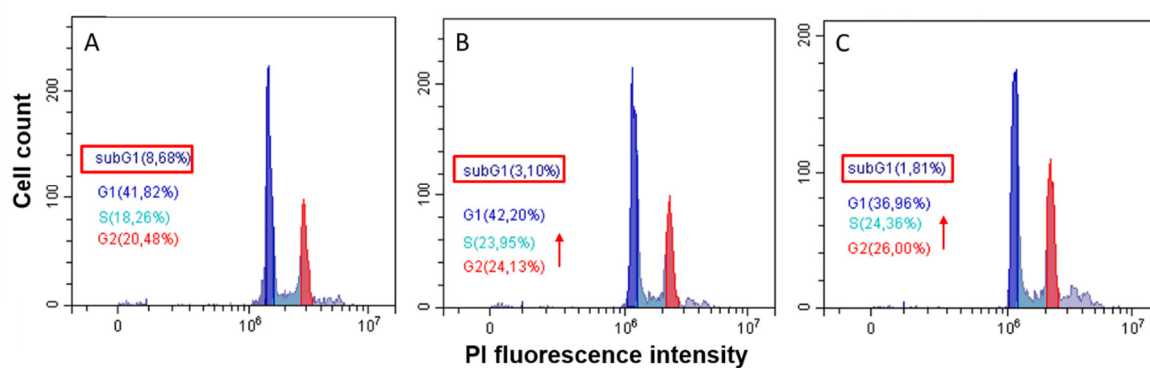

**Figure S3.** Cell cycle of MSCs cultivated under SD and hypoxia conditions for 24 hours (precondition) followed by (A) 3 hours under normoxic condition with addition of H<sub>2</sub>O<sub>2</sub> 100 μM; (B) 3 hours normoxic condition with addition of apoA-I and H<sub>2</sub>O<sub>2</sub> 100 μM (B) and (C) MSCs cultivated under SD and hypoxia conditions with apoA-I for 24 hours followed by 3 hours normoxic condition with addition of apoA-I and H<sub>2</sub>O<sub>2</sub> 100 μM.

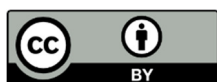

© 2020 by the authors. Submitted for possible open access publication under the terms and conditions of the Creative Commons Attribution (CC BY) license (<http://creativecommons.org/licenses/by/4.0/>).
